# Supplementary material
Source: PubMed Central journal article supplement (PMC5450639)

**a**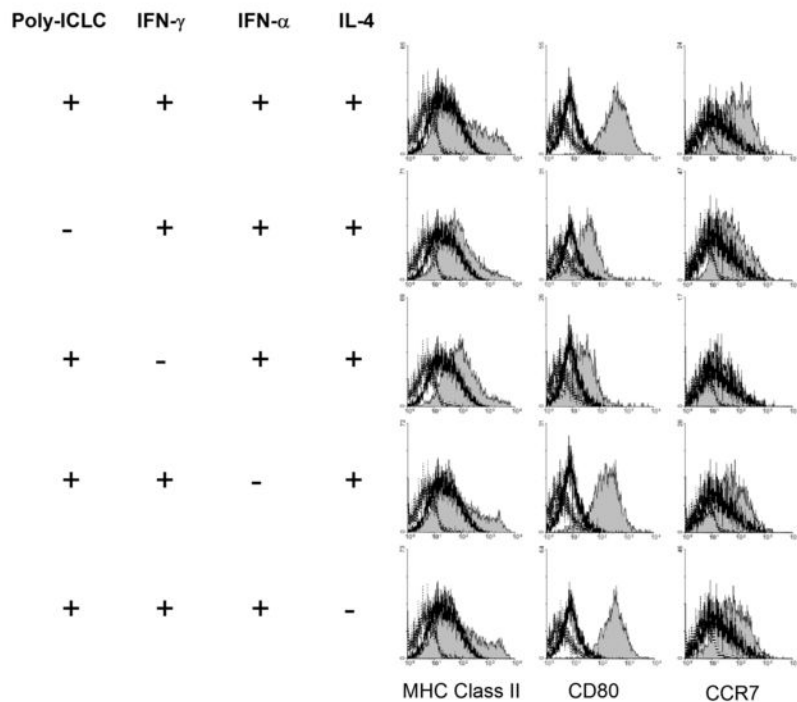**b**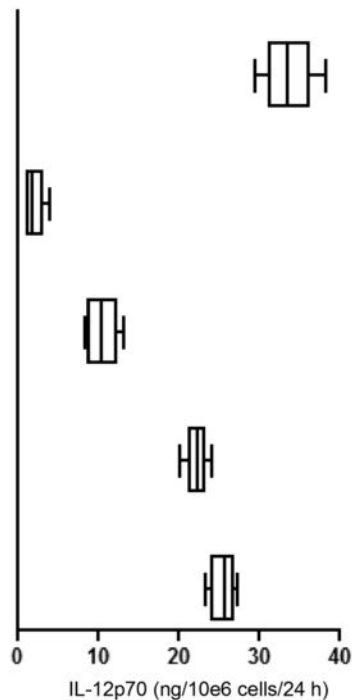**Supplementary Figure 1**

Supplement: NIHMS83293-supplement-supplement_1.pdf [file NIHMS83293-supplement-supplement_1.pdf]

**a**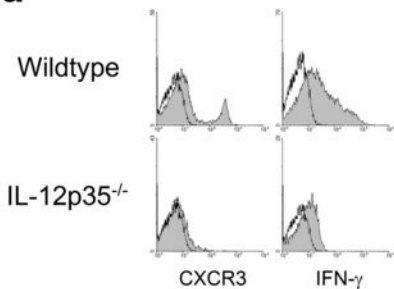**b**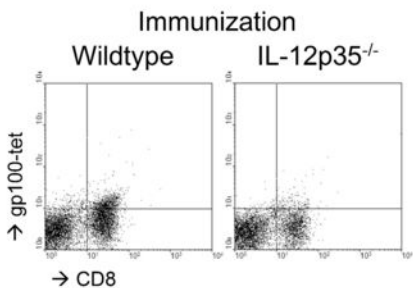**c**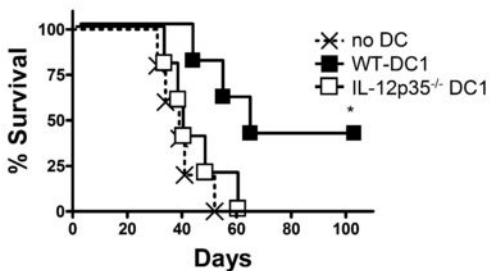**Supplementary Figure 2**

Supplement: NIHMS83293-supplement-supplement_2.pdf [file NIHMS83293-supplement-supplement_2.pdf]
